# Supplementary material for: An in situ spontaneously forming micelle-hydrogel system with programmable release for the sequential therapy of anaplastic thyroid cancer
Source: Royal Society of Chemistry journal article supplement (doi:10.1039/d1tb01904j), 2022-01-01
Supplement: d1tb01904j1.pdf [file d1tb01904j1.pdf]

## Supplementary Materials

### **An *in situ* spontaneously-forming micelle-hydrogel system with programable release for sequential therapy of anaplastic thyroid cancer**

Xi Yang<sup>1,#</sup>, Lingyun Zhang<sup>2,3,#</sup>, Lingnan Zheng<sup>1</sup>, Yan Wang<sup>4</sup>, Ling Gao<sup>1</sup>, Rui Luo<sup>4</sup>,  
Xinchao Li<sup>4</sup>, Changyang Gong<sup>4</sup>, Han Luo<sup>2\*</sup>, Qinjie Wu<sup>4,\*</sup>

<sup>1</sup> Department of Medical Oncology, Cancer Center, West China Hospital, Sichuan University, Chengdu 610041, P. R. China

<sup>2</sup> Department of Thyroid and Parathyroid Surgery, Laboratory of thyroid and parathyroid disease, Frontiers Science Center for Disease-related Molecular Network, West China Hospital, Sichuan University, Chengdu 610041, P. R. China

<sup>3</sup> West China School of Medicine, Sichuan University, Chengdu 610041, P. R. China

<sup>4</sup> State Key Laboratory of Biotherapy and Cancer Center, West China Hospital, Sichuan University, Chengdu 610041, P. R. China

\* To whom correspondence should be addressed (Q Wu and H Luo). E-mail: cellwqj@163.com and luohan-hx@scu.edu.cn.

# These authors contributed equally to this work.

**Supplementary Table 1. Characteristics of ATC cell lines C643 and 8305C**

| <b>Cell Line</b>             | <b>C643</b>   | <b>8305C</b>  |
|------------------------------|---------------|---------------|
| <b>Year of establishment</b> | 1987          | 1993          |
| <b>Patient Age</b>           | 76            | 67            |
| <b>Patient Gender</b>        | Male          | Male          |
| <b>Derivation</b>            | Primary Tumor | Primary Tumor |
| <b>BRAF</b>                  | -             | p.V600*       |
| <b>HRAS</b>                  | p.G13R*       | -             |
| <b>TP53</b>                  | p.R248Q       | p.R273C       |
| <b>TERT promoter</b>         | c.-124C>T     | c.-146C>T     |

\* Key genetic driver.

**A**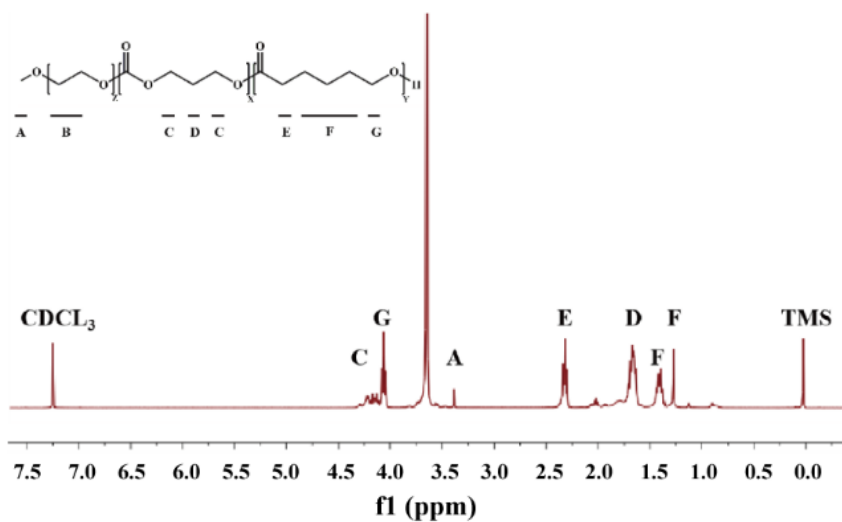**B**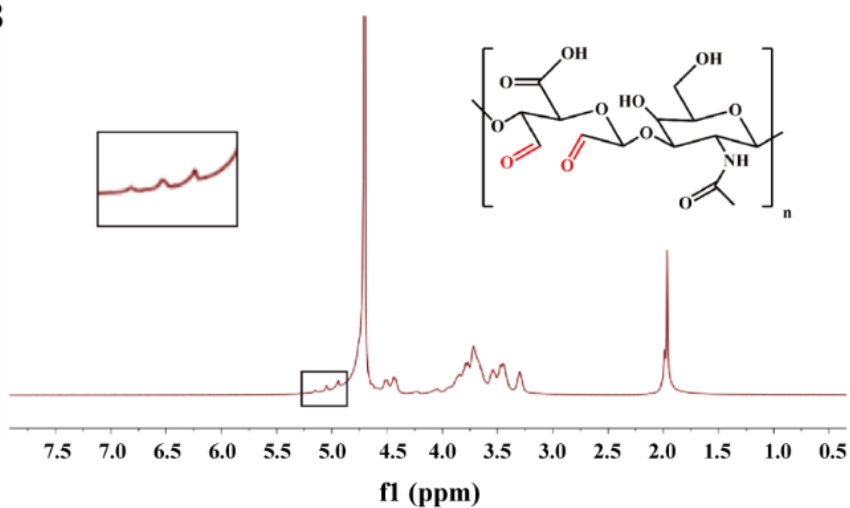

Supplementary Figure 1. <sup>1</sup>H-NMR spectrum of MPEG-P(CL-ran-TMC) in CDCl<sub>3</sub> (A) and AHA (B).

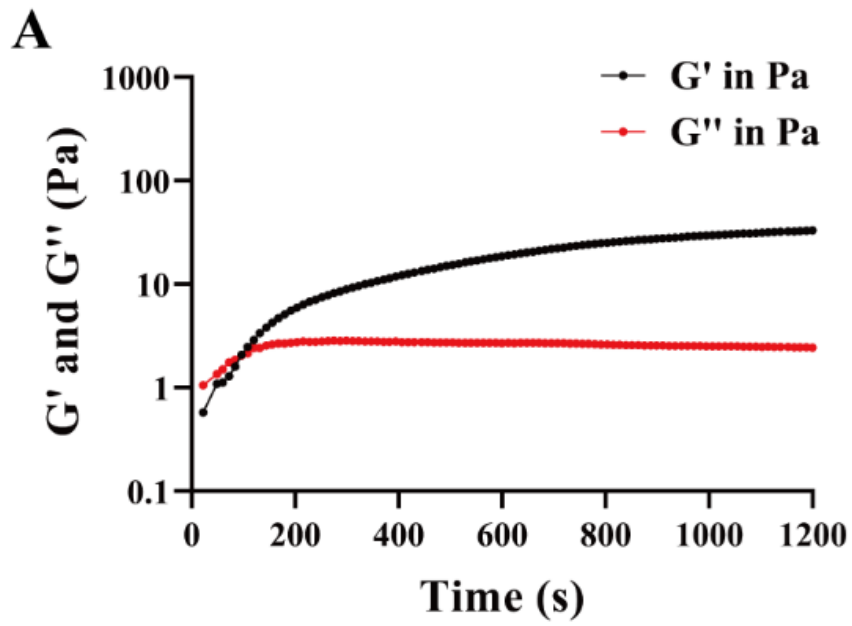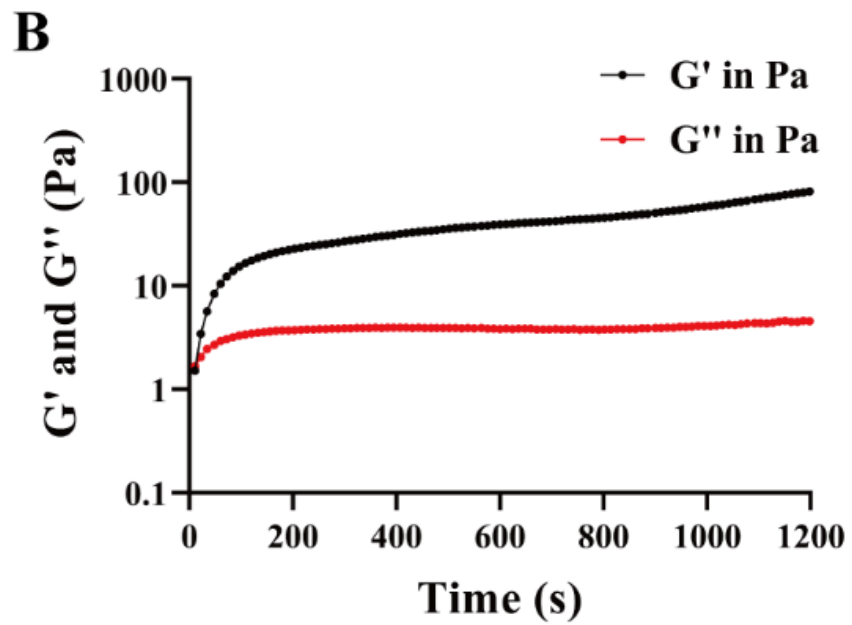

**Supplementary Figure 2. Rheological analysis for the drug loaded NOCC/AHA hydrogel.**

Time-dependence of storage modulus ( $G'$ ), loss modulus ( $G''$ ) for the drug loaded NOCC/AHA hydrogel. (A) DDP-hydrogel; (B)  $P_m$ -hydrogel.

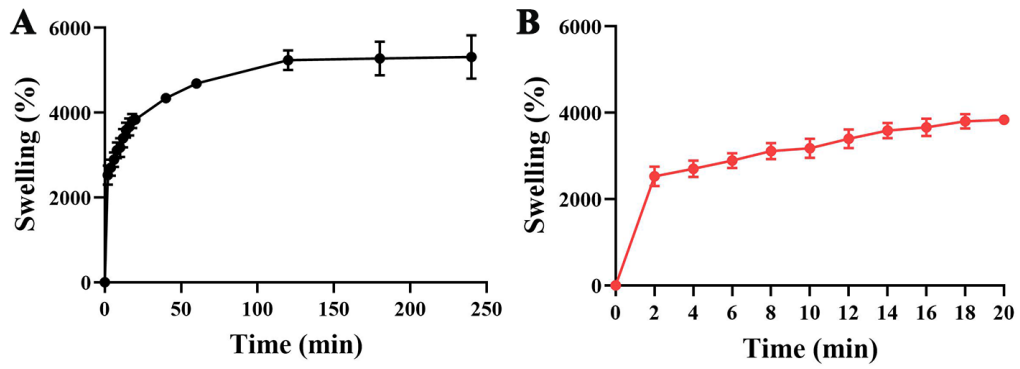

**Supplementary Figure 3.** (A&B) Swelling kinetics of NOCC/AHA hydrogel in the different time.

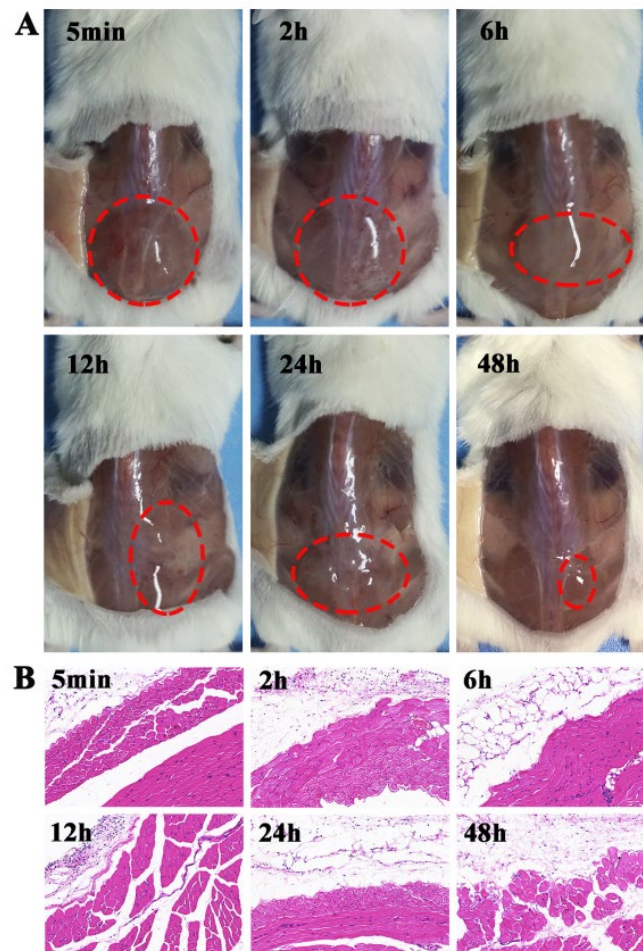

**Supplementary Figure 4.** *In vivo* degradation and biocompatibility of the NOCC-AHA hydrogel. (A) Gross observation of degradation assay in the different time; (B) Histological observations of biocompatibility assay in the different time.

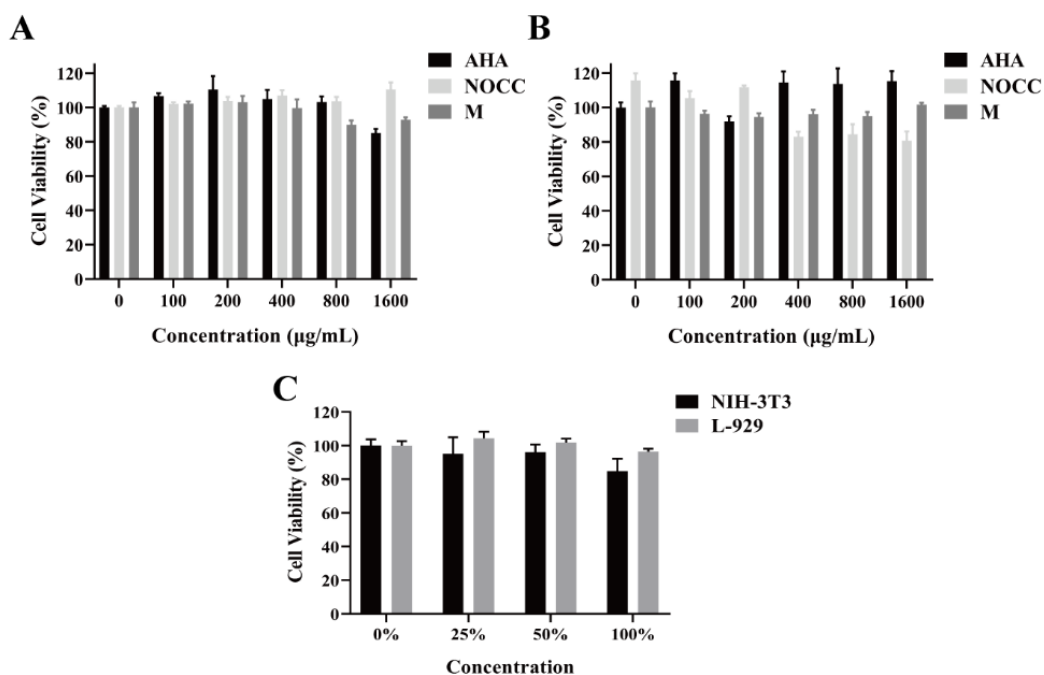

**Supplementary Figure 5. Effect of AHA, NOCC, MPEG-P(CL-*ran*-TMC) and NOCC/AHA hydrogel extracts on cell viability measured by MTT assay.**

(A) Cytotoxicity on NIH-3T3 and (B) L929 cells after 2-day incubation with AHA, NOCC or MPEG-P(CL-*ran*-TMC) at different concentrations; (C) Cytotoxicity on NIH-3T3 cells and L929 cells after 2-day incubation with the NOCC/AHA hydrogel extracts. Data were presented as mean  $\pm$  SD (n = 3).

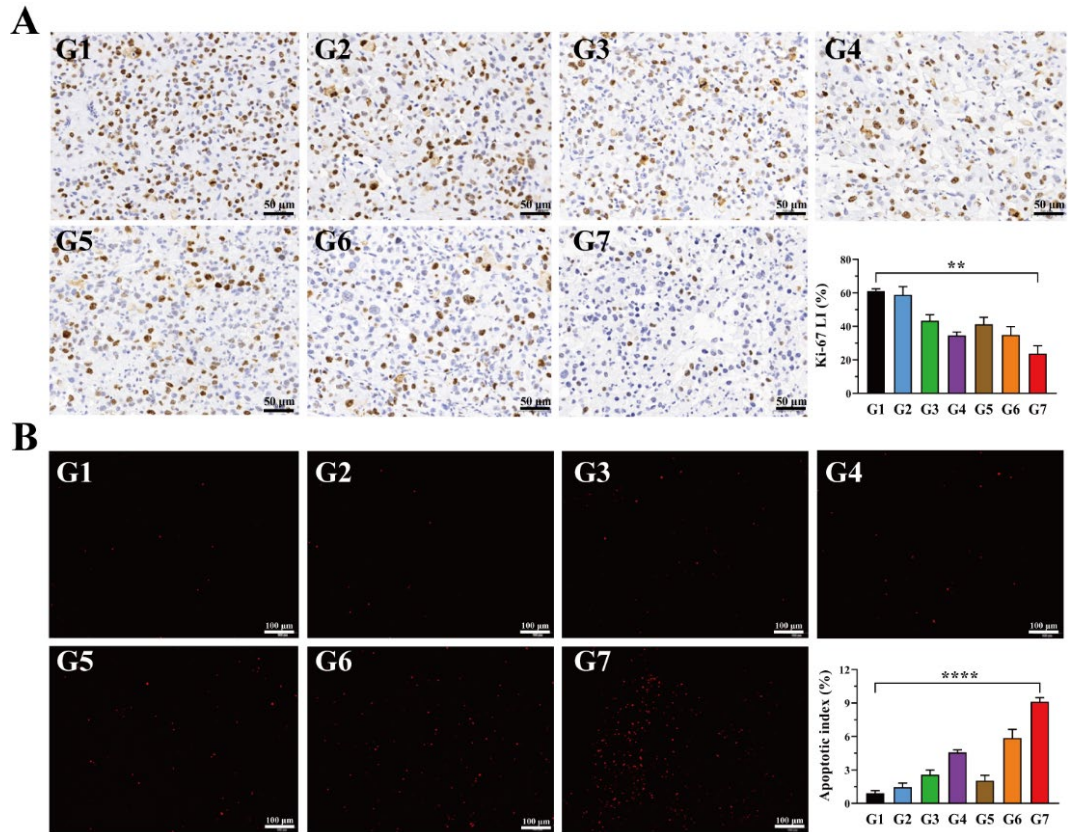

**Supplementary Figure 6. Ki-67 immunohistochemical and TUNEL immunofluorescent staining of 8305C tumors.**

(A) Representative Ki-67 immunohistochemical images of 8305C tumors and mean Ki-67 LI for each group (G1: NS i.t., G2: Micelle-hydrogel i.t., G3: P<sub>m</sub> + DDP i.v., G4: P<sub>m</sub> + DDP i.t., G5: P<sub>m</sub>-hydrogel i.t., G6: DDP-hydrogel i.t., G7: iMHS i.t.). Scale bar = 50 μm; (B) Representative TUNEL immunofluorescent images of 8305C tumors and mean apoptotic index for each group. Scale bar = 100 μm. LI: labelling index.



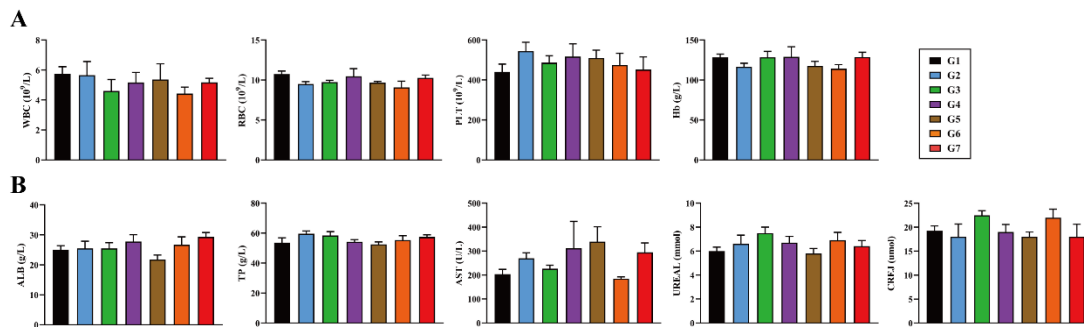

**Supplementary Figure 7. Complete blood count and serum biochemistry study of the C643 subcutaneous tumor-bearing mice.**

(A) Complete blood count including white blood cell (WBC), red blood cell (RBC), hemoglobin (Hb) and platelet (PLT) of each group; (B) Serum chemistry profile including total protein (TP), albumin (ALB), aspartate transaminase (AST), blood urea (UREAL), creatinine (CREJ) of each group.

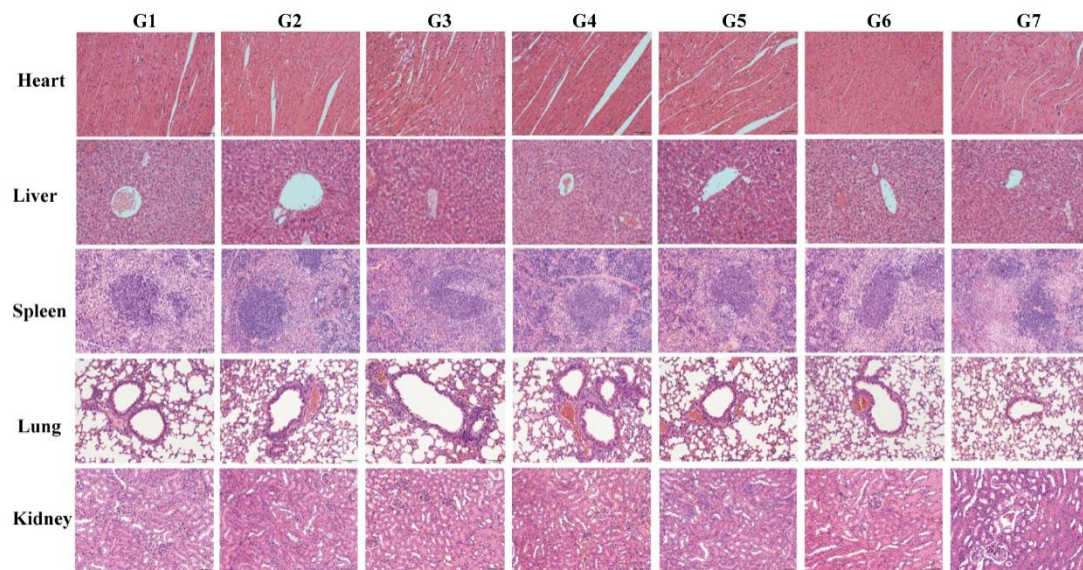

**Supplementary Figure 8. Representative hematoxylin-eosin staining images of major organs (heart, lung, liver, spleen, and kidney) of each group in the C643 subcutaneous tumor-bearing mice.**



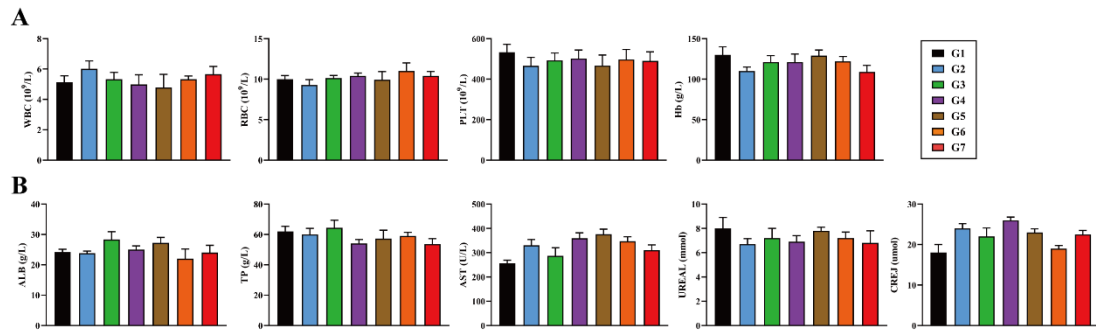

**Supplementary Figure 9. Complete blood count and serum biochemistry study of the 8305C subcutaneous tumor-bearing mice.**

(A) Complete blood count including white blood cell (WBC), red blood cell (RBC), hemoglobin (Hb) and platelet (PLT) of each group; (B) Serum chemistry profile including total protein (TP), albumin (ALB), aspartate transaminase (AST), blood urea (UREAL), creatinine (CREJ) of each group.

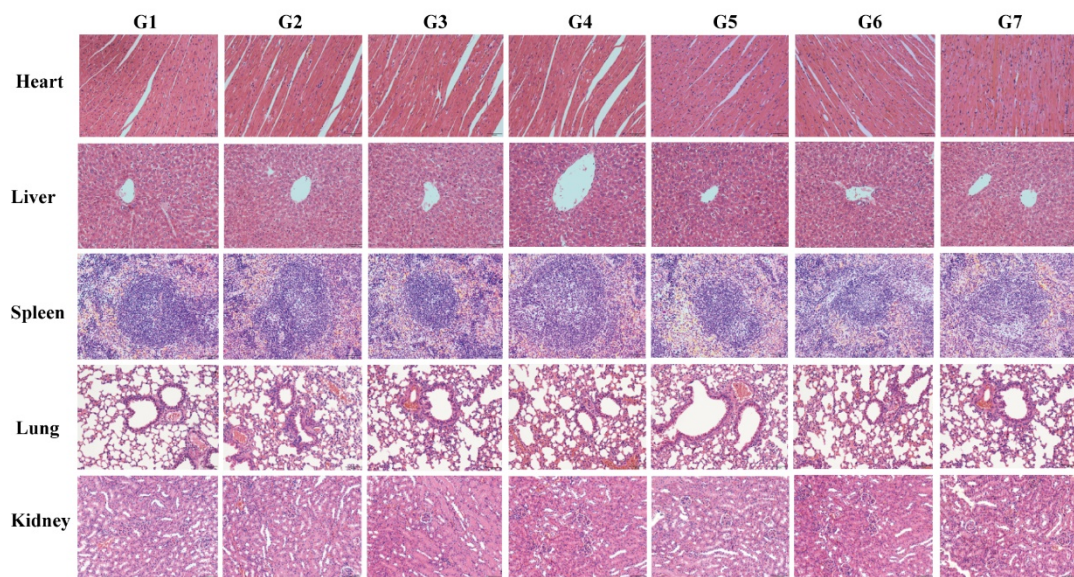

**Supplementary Figure 10. Representative hematoxylin-eosin staining images of major organs (heart, lung, liver, spleen, and kidney) of each group in the 8305C subcutaneous tumor-bearing mice.**
